# Supplementary material for: Exploring Spin-Phonon Coupling in Magnetic 2D Metal-Organic Frameworks
Source: MDPI journal article supplement (doi:10.3390/nano13071172), 2023-03-25
Supplement: s1 [file s1]

# Exploring Spin-Phonon Coupling in Magnetic 2D Metal-Organic Frameworks

Diego López-Alcalá, Alberto M. Ruiz and José J. Baldoví \*

Instituto de Ciencia Molecular, Universitat de València, 46980 Paterna, Spain

\* Correspondence: j.jaime.baldovi@uv.es

## S1. Structural Parameters

**Table S1.** Geometrical parameters of the  $VX_2(\text{pyz})_2$  and  $\text{CrX}_2(\text{pyz})_2$  systems as described in Figure S1.

| X                    | M = Cr | M = V  |
|----------------------|--------|--------|
| <b>Cl</b>            |        |        |
| $\alpha$ (°)         | 25.68  | 25.89  |
| $\beta$ (°)          | 90.42  | 90.12  |
| $\gamma$ (°)         | 123.68 | 123.19 |
| Cl-M (Å)             | 2.33   | 2.38   |
| M-N(Å)               | 2.09   | 2.15   |
| N-C(Å)               | 1.36   | 1.36   |
| C-C(Å)               | 1.37   | 1.38   |
| Lattice vector a (Å) | 7.049  | 7.156  |
| Lattice vector b (Å) | 7.047  | 7.156  |
| <b>Br</b>            |        |        |
| $\alpha$ (°)         | 30.44  | 30.20  |
| $\beta$ (°)          | 90.52  | 90.17  |
| $\gamma$ (°)         | 124.02 | 123.68 |
| Br-M (Å)             | 2.52   | 2.57   |
| M-N(Å)               | 2.09   | 2.16   |
| N-C(Å)               | 1.36   | 1.35   |
| C-C(Å)               | 1.37   | 1.38   |
| Lattice vector a (Å) | 7.049  | 7.168  |
| Lattice vector b (Å) | 7.048  | 7.168  |
| <b>I</b>             |        |        |
| $\alpha$ (°)         | 35.67  | 35.32  |
| $\beta$ (°)          | 90.46  | 90.27  |
| $\gamma$ (°)         | 124.89 | 124.14 |
| I-M (Å)              | 2.77   | 2.82   |
| M-N(Å)               | 2.10   | 2.17   |
| N-C(Å)               | 1.36   | 1.35   |
| C-C(Å)               | 1.37   | 1.38   |
| Lattice vector a (Å) | 7.084  | 7.210  |
| Lattice vector b (Å) | 7.081  | 7.210  |

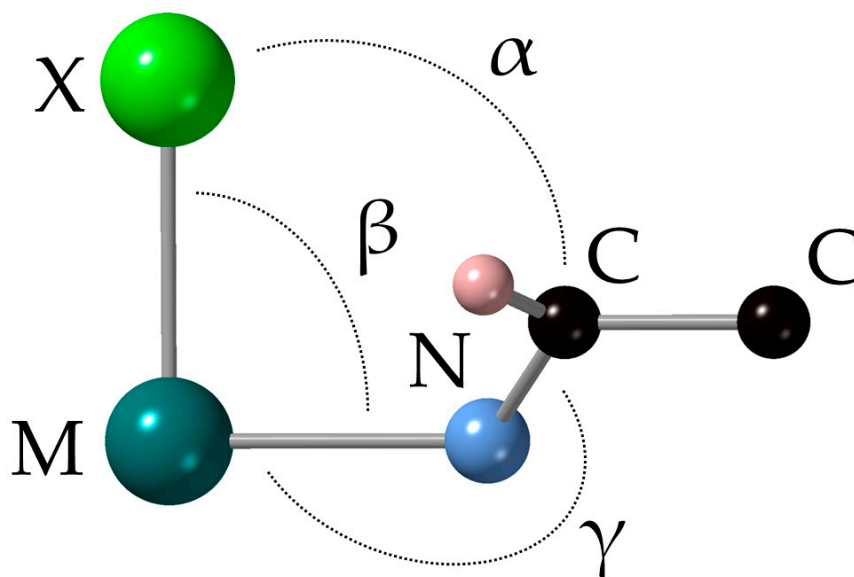

**Figure S1:** Structural scheme followed to define the structural parameters of the described systems. Color code: M (dark green), Cl (green), C (black), N (blue) and H (pink).

## S2. Electronic structure

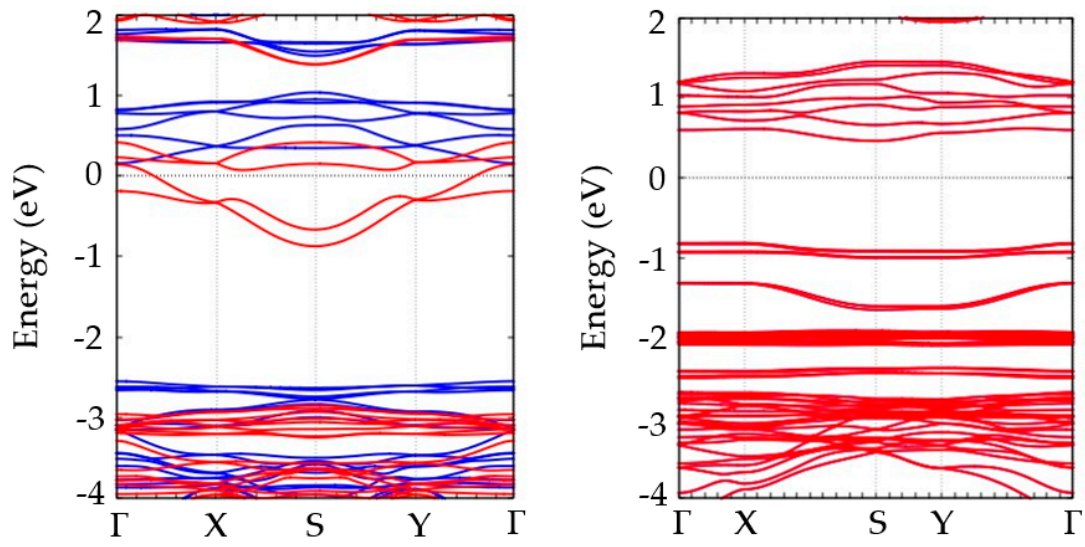

**Figure S2:** Electronic band structure of (left)  $\text{CrCl}_2(\text{pyz})_2$  and (right)  $\text{VCl}_2(\text{pyz})_2$  bulk materials.

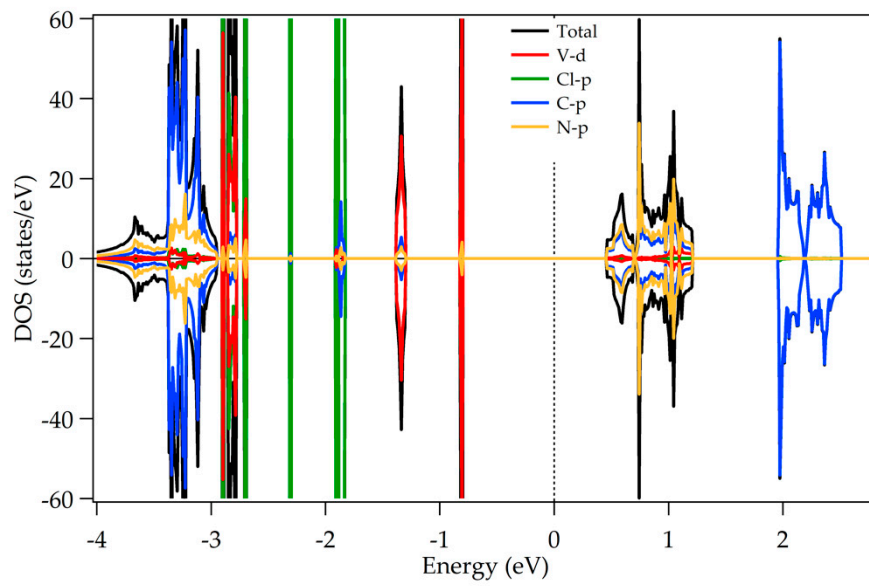

**Figure S3:** Calculated projected density of states (pDOS) for  $\text{VCl}_2(\text{pyz})_2$ .

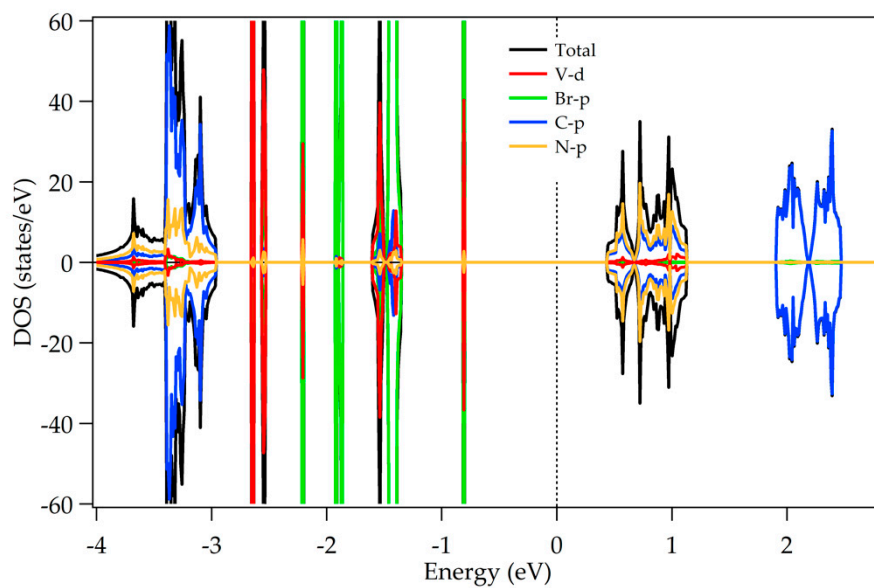

**Figure S4:** Calculated projected density of states (pDOS) for  $\text{VBr}_2(\text{pyz})_2$ .

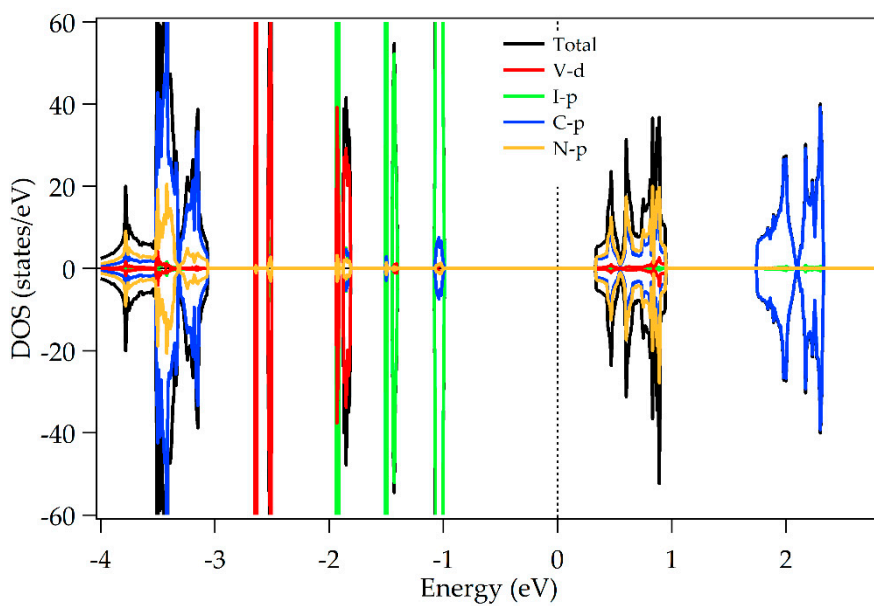

**Figure S5:** Calculated projected density of states (pDOS) for  $\text{VI}_2(\text{pyz})_2$ .

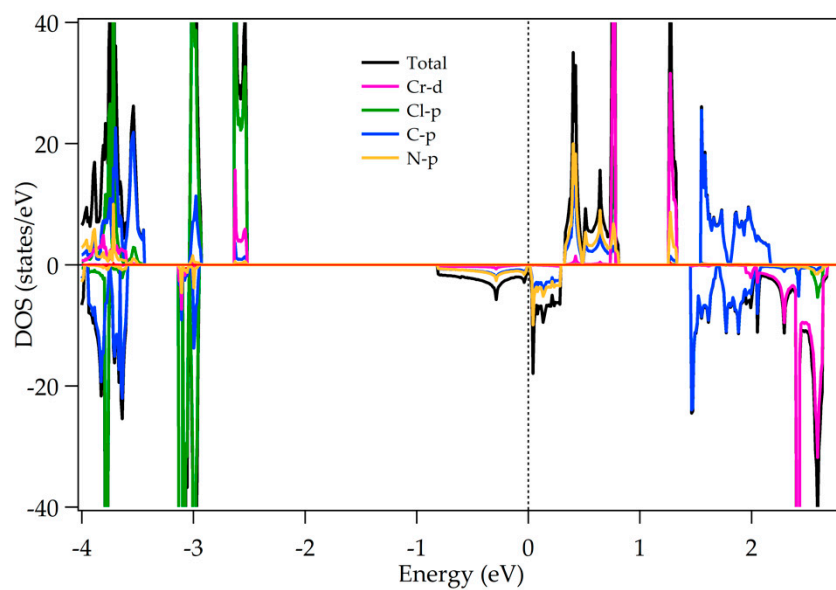

**Figure S6:** Calculated projected density of states (pDOS) for  $\text{CrCl}_2(\text{pyz})_2$ .

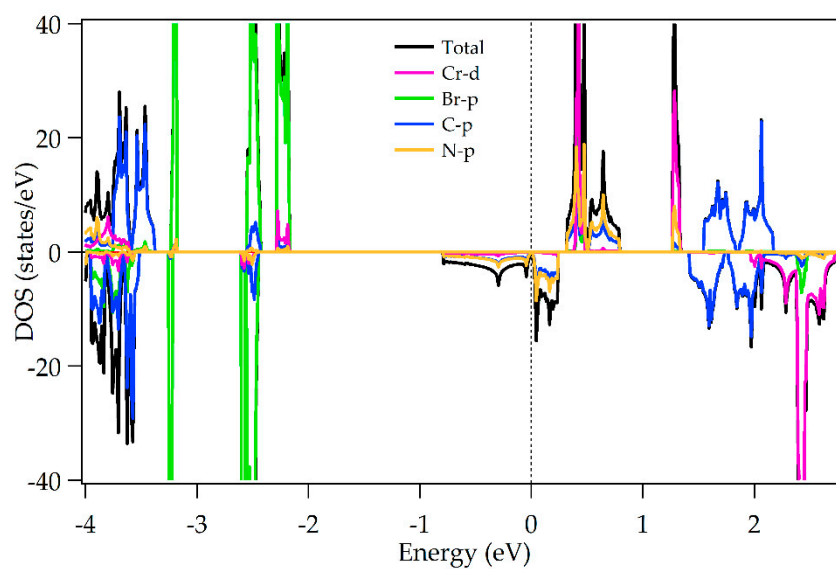

**Figure S7:** Calculated projected density of states (pDOS) for  $\text{CrBr}_2(\text{pyz})_2$ .

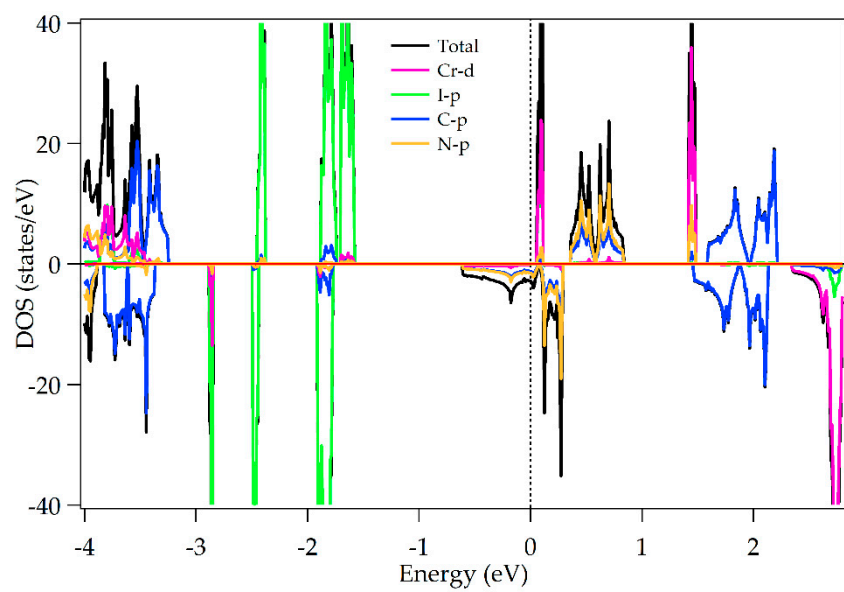

**Figure S8:** Calculated projected density of states (pDOS) for  $\text{CrI}_2(\text{pyz})_2$ .

### S3. Population of Phonon Modes

In order to elucidate the population of the phonon modes at the magnetic phase transition temperature for the  $\text{CrCl}_2(\text{pyz})_2$  and  $\text{VCl}_2(\text{pyz})_2$  compounds claimed by Pedersen et al. we assumed a Boltzmann distribution of the population of the different phonon modes. In that way, we are able to predict the probability of each vibrational state as a function of the energy and the temperature of the system as:

$$p_i = \frac{e^{-\frac{\varepsilon_i}{k_B T}}}{\sum_{j=1}^M e^{-\frac{\varepsilon_j}{k_B T}}} \quad (\text{S1})$$

where  $p_i$  is the occupational probability of each state,  $\varepsilon_i$  the energy of each state and  $k_B$  the Boltzmann constant.

Then we evaluated the probabilities of occupation of each state, and we obtained the distribution of populations at the magnetic phase transition temperature of each system using the data represented in Tables S2 and S3. We considered occupied those quantity of consecutive levels which suppose a significant population of 0.9999 out of 1, considering negligible the population of the rest of the vibrational states. Considering 55 K the magnetic phase transition temperature for the  $\text{CrCl}_2(\text{pyz})_2$  system we consider significantly populated the first 18 phonon modes, with a sum of populations of 0.999903. In the case of the  $\text{VCl}_2(\text{pyz})_2$  system, with a magnetic phase transition temperature of 120 K, we consider significantly populated the first 34 phonon modes, with a sum of populations of 0.999924.

**Table S2:** Population analysis parameter for each phonon mode in  $\text{VCl}_2(\text{pyz})_2$  at 120 K.

| Phonon mode | Frequency ( $\text{cm}^{-1}$ ) | Energy (eV) | Population  |
|-------------|--------------------------------|-------------|-------------|
| 1           | 71.4201                        | 0.008854968 | 0.342064157 |
| 2           | 107.4374                       | 0.013320546 | 0.133326426 |
| 3           | 116.9119                       | 0.014495235 | 0.104058309 |
| 4           | 117.9587                       | 0.014625022 | 0.101247453 |
| 5           | 123.9167                       | 0.01536372  | 0.086635417 |
| 6           | 126.3295                       | 0.015662869 | 0.081336172 |
| 7           | 131.0057                       | 0.016242644 | 0.071971007 |
| 8           | 185.1015                       | 0.022949672 | 0.017481433 |
| 9           | 189.321                        | 0.023472823 | 0.015654508 |
| 10          | 196.2156                       | 0.024327645 | 0.013071039 |
| 11          | 196.6909                       | 0.024386575 | 0.012909524 |
| 12          | 226.8012                       | 0.028119778 | 0.005872569 |
| 13          | 235.7826                       | 0.02923333  | 0.004642915 |
| 14          | 236.9666                       | 0.029380127 | 0.004501315 |
| 15          | 258.4101                       | 0.032038784 | 0.002568742 |
| 16          | 287.6041                       | 0.03565838  | 0.001196874 |
| 17          | 289.4691                       | 0.035889611 | 0.001139883 |
| 18          | 352.3664                       | 0.043687886 | 0.000219931 |
| 19          | 402.3011                       | 0.049879002 | 5.95634E-05 |
| 20          | 418.8887                       | 0.051935603 | 3.85948E-05 |
| 21          | 524.9681                       | 0.065087779 | 2.40638E-06 |
| 22          | 539.8906                       | 0.066937934 | 1.62866E-06 |
| 23          | 667.9633                       | 0.082816932 | 5.71216E-08 |
| 24          | 675.5488                       | 0.083757415 | 4.68405E-08 |
| 25          | 724.9607                       | 0.089883712 | 1.28604E-08 |
| 26          | 729.0079                       | 0.090385501 | 1.15684E-08 |
| 27          | 780.4615                       | 0.096764938 | 3.01101E-09 |
| 28          | 791.1208                       | 0.098086523 | 2.27831E-09 |
| 29          | 860.1209                       | 0.106641449 | 3.74718E-10 |
| 30          | 879.3985                       | 0.109031568 | 2.26304E-10 |
| 31          | 940.3838                       | 0.116592785 | 4.59029E-11 |
| 32          | 959.0167                       | 0.118902971 | 2.81937E-11 |
| 33          | 1021.3622                      | 0.126632831 | 5.51884E-12 |
| 34          | 1026.9278                      | 0.127322878 | 4.77108E-12 |
| 35          | 1034.3347                      | 0.128241217 | 3.93068E-12 |
| 36          | 1036.4653                      | 0.128505378 | 3.71759E-12 |
| 37          | 1040.0627                      | 0.128951399 | 3.3837E-12  |
| 38          | 1049.0819                      | 0.130069638 | 2.67254E-12 |
| 39          | 1076.8711                      | 0.133515061 | 1.29185E-12 |
| 40          | 1082.6237                      | 0.134228293 | 1.11137E-12 |
| 41          | 1126.9455                      | 0.139723498 | 3.48593E-13 |
| 42          | 1146.6815                      | 0.142170451 | 2.08017E-13 |
| 43          | 1148.2565                      | 0.142365727 | 1.99621E-13 |
| 44          | 1154.6727                      | 0.143161234 | 1.68776E-13 |
| 45          | 1262.575                       | 0.156539421 | 1.00331E-14 |
| 46          | 1263.2674                      | 0.156625267 | 9.85305E-15 |
| 47          | 1273.3981                      | 0.157881315 | 7.5592E-15  |
| 48          | 1293.0528                      | 0.160318188 | 4.52043E-15 |
| 49          | 1390.5815                      | 0.172410211 | 3.525E-16   |

|    |           |             |             |
|----|-----------|-------------|-------------|
| 50 | 1397.9189 | 0.173319933 | 2.90937E-16 |
| 51 | 1464.3111 | 0.181551521 | 5.12295E-17 |
| 52 | 1471.8633 | 0.182487875 | 4.20455E-17 |
| 53 | 1521.2386 | 0.188609634 | 1.1555E-17  |
| 54 | 1527.5701 | 0.189394641 | 9.79121E-18 |
| 55 | 1541.7021 | 0.191146786 | 6.76524E-18 |
| 56 | 1544.2819 | 0.191466641 | 6.32375E-18 |
| 57 | 1643.095  | 0.203717909 | 4.76828E-19 |
| 58 | 1657.789  | 0.205539734 | 3.24656E-19 |
| 59 | 3244.9538 | 0.402323179 | 3.01785E-37 |
| 60 | 3246.0034 | 0.402453313 | 2.93612E-37 |
| 61 | 3249.3426 | 0.402867322 | 2.69053E-37 |
| 62 | 3250.2001 | 0.402973638 | 2.63085E-37 |
| 63 | 3254.1586 | 0.40346443  | 2.37204E-37 |
| 64 | 3261.0224 | 0.404315433 | 1.98218E-37 |
| 65 | 3265.2646 | 0.404841399 | 1.77398E-37 |
| 66 | 3272.1905 | 0.405700101 | 1.48E-37    |

**Table S3:** Population analysis parameter for each phonon mode in CrCl<sub>2</sub>(pyz)<sub>2</sub> at 55 K.

| Phonon mode | Frequency (cm <sup>-1</sup> ) | Energy (eV) | Population  |
|-------------|-------------------------------|-------------|-------------|
| 1           | 72.129                        | 0.00894286  | 0.418251995 |
| 2           | 122.7602                      | 0.015220332 | 0.111229162 |
| 3           | 123.3048                      | 0.015287854 | 0.109655769 |
| 4           | 129.3375                      | 0.016035814 | 0.093647068 |
| 5           | 139.4894                      | 0.017294489 | 0.071805678 |
| 6           | 140.1019                      | 0.01737043  | 0.070664322 |
| 7           | 147.2891                      | 0.018261529 | 0.058552664 |
| 8           | 200.8281                      | 0.024899522 | 0.014430849 |
| 9           | 203.0703                      | 0.02517752  | 0.013608753 |
| 10          | 217.6333                      | 0.026983103 | 0.009297551 |
| 11          | 218.3125                      | 0.027067313 | 0.009133815 |
| 12          | 221.2336                      | 0.027429483 | 0.008461857 |
| 13          | 257.8686                      | 0.031971646 | 0.003245314 |
| 14          | 260.0574                      | 0.032243023 | 0.003064713 |
| 15          | 270.8122                      | 0.033576449 | 0.002313156 |
| 16          | 297.5659                      | 0.036893486 | 0.001148833 |
| 17          | 301.6344                      | 0.037397916 | 0.001032844 |
| 18          | 342.0229                      | 0.042405454 | 0.000359073 |
| 19          | 410.5548                      | 0.050902331 | 5.97852E-05 |
| 20          | 432.841                       | 0.053665469 | 3.33735E-05 |
| 21          | 535.3846                      | 0.066379261 | 2.28248E-06 |
| 22          | 569.3302                      | 0.070587981 | 9.39187E-07 |
| 23          | 655.9863                      | 0.081331973 | 9.73318E-08 |
| 24          | 673.7412                      | 0.083533301 | 6.11705E-08 |
| 25          | 721.489                       | 0.089453276 | 1.75421E-08 |
| 26          | 727.1465                      | 0.090154717 | 1.51289E-08 |
| 27          | 763.8723                      | 0.094708138 | 5.7885E-09  |
| 28          | 778.2382                      | 0.096489283 | 3.97517E-09 |
| 29          | 852.3681                      | 0.105680224 | 5.717E-10   |
| 30          | 879.0154                      | 0.10898407  | 2.84727E-10 |
| 31          | 911.4562                      | 0.113006218 | 1.21862E-10 |
| 32          | 933.9501                      | 0.115795107 | 6.76578E-11 |
| 33          | 1005.266                      | 0.124637156 | 1.04737E-11 |
| 34          | 1009.2372                     | 0.125129522 | 9.44025E-12 |
| 35          | 1010.9943                     | 0.125347375 | 9.01615E-12 |
| 36          | 1016.5359                     | 0.126034446 | 7.79943E-12 |
| 37          | 1024.2918                     | 0.126996056 | 6.3672E-12  |
| 38          | 1032.2858                     | 0.127987186 | 5.1657E-12  |
| 39          | 1058.0405                     | 0.131180363 | 2.63348E-12 |
| 40          | 1063.7678                     | 0.131890458 | 2.26706E-12 |
| 41          | 1106.6346                     | 0.137205266 | 7.38677E-13 |
| 42          | 1122.9799                     | 0.139231826 | 4.81678E-13 |
| 43          | 1125.2914                     | 0.139518416 | 4.53415E-13 |
| 44          | 1131.2531                     | 0.140257573 | 3.8794E-13  |
| 45          | 1240.3367                     | 0.153782222 | 2.23599E-14 |
| 46          | 1243.003                      | 0.154112801 | 2.08535E-14 |
| 47          | 1272.4675                     | 0.157765935 | 9.6479E-15  |
| 48          | 1294.4944                     | 0.160496924 | 5.42233E-15 |
| 49          | 1380.4206                     | 0.17115042  | 5.72771E-16 |

|    |           |             |             |
|----|-----------|-------------|-------------|
| 50 | 1386.8273 | 0.17194475  | 4.8439E-16  |
| 51 | 1460.36   | 0.181061647 | 7.07608E-17 |
| 52 | 1462.8642 | 0.181372128 | 6.62739E-17 |
| 53 | 1488.743  | 0.184580692 | 3.36771E-17 |
| 54 | 1494.4162 | 0.185284079 | 2.90323E-17 |
| 55 | 1514.6954 | 0.187798381 | 1.70801E-17 |
| 56 | 1519.7883 | 0.18842982  | 1.49496E-17 |
| 57 | 1613.6963 | 0.200072934 | 1.28157E-18 |
| 58 | 1635.6234 | 0.202791549 | 7.22156E-19 |
| 59 | 3240.4529 | 0.401765139 | 4.2288E-37  |
| 60 | 3244.8503 | 0.402310347 | 3.76928E-37 |
| 61 | 3246.958  | 0.402571669 | 3.56708E-37 |
| 62 | 3251.4689 | 0.403130949 | 3.17004E-37 |
| 63 | 3253.5603 | 0.40339025  | 3.00127E-37 |
| 64 | 3259.0726 | 0.404073688 | 2.59824E-37 |
| 65 | 3265.2951 | 0.40484518  | 2.20793E-37 |
| 66 | 3274.0415 | 0.405929596 | 1.75638E-37 |

## S4. Finite Displacements in Phonon Modes Distortion

In order to recompute the single ion anisotropy (D) or magnetic exchange coupling (J) we need to obtain the distorted geometries provoked by the phonon mode as:

$$Q_v = Q_{eq} + v \cdot Q_p \quad (S2)$$

where  $Q_v$  is the distorted geometry,  $Q_{eq}$  is the equilibrium geometry,  $v$  is the applied finite distortion and  $Q_p$  is the vector displacement of each mode.

We consider this  $v$  as the one which equally the energy of this phonon mode with the energy of the next phonon mode, as defined by the harmonic oscillator approximation:

$$\frac{1}{2}k v^2 = \frac{1}{2}\hbar\omega \quad (S3)$$

where  $k$  is the force constant of each phonon mode,  $\hbar$  is the Planck constant and  $\omega$  is the angular frequency.

Using this approximation, we applied the calculated finite displacement to each distorted geometry and then we recalculated the magnetic parameters on this situation.

## S5. Calculated Variation of J and D with $Q_k$

For calculating the evolution of J and D as a function of the temperature we needed to evaluate the variation of these parameters within a finite change in the molecular coordinates ( $Q_k$ ). We defined this  $Q_k$  as the change in each cartesian coordinate of the system within a distortion caused by a lattice vibration and we computed it as

$$Q_k = \sqrt{(x'_i - x_i)^2 + (y'_i - y_i)^2 + (z'_i - z_i)^2} \dots \quad (S4)$$

where  $x'_i$  is the x Cartesian coordinate of an atom  $i$  within a phonon mode distortion and  $x_i$  is the x Cartesian coordinate of an atom  $i$  in the equilibrium position.

Then, we represented the actual value of J and D at each  $Q_k$  in order to evaluate the  $\left(\frac{\partial^2 B}{\partial Q_k^2}\right)_e$  term in Equation 1 and 2 in the main text for each phonon mode (Figures S9-44) and the obtained results are summarized in Tables S4 and S5.

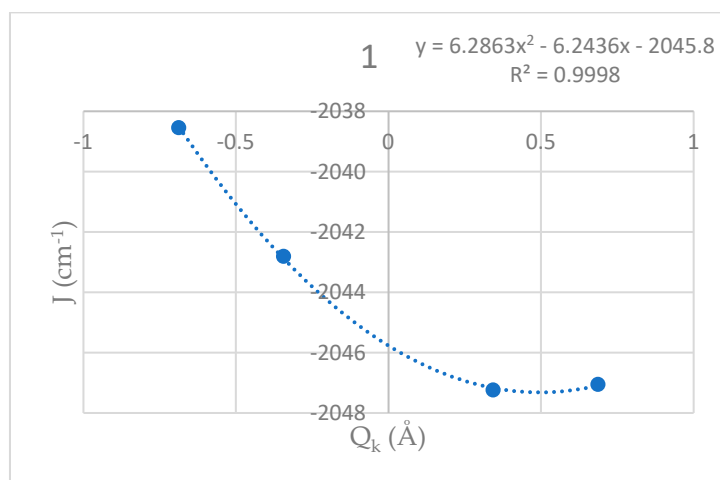

**Figure S9:** Calculated J values as a function of the distorted geometries  $Q_k$  with the fitting 2<sup>nd</sup> grade polynomial for phonon mode 1 at the  $\text{CrCl}_2(\text{pyz})_2$  system.

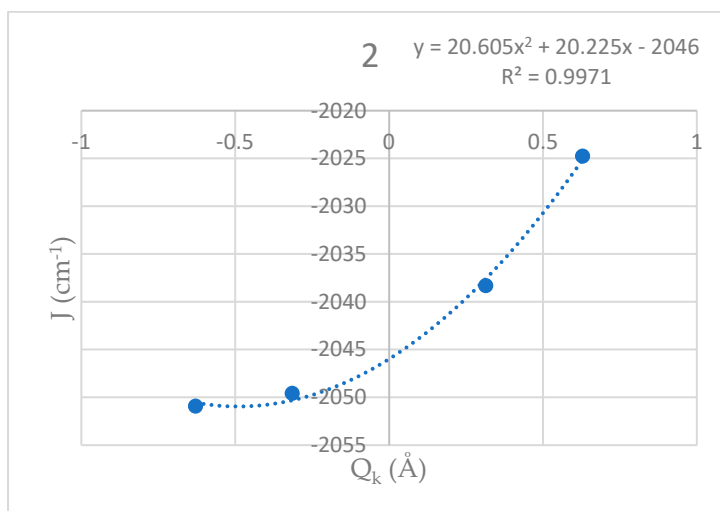

**Figure S10:** Calculated J values as a function of the distorted geometries  $Q_k$  with the fitting 2<sup>nd</sup> grade polynomial for phonon mode 2 at the  $\text{CrCl}_2(\text{pyz})_2$  system.

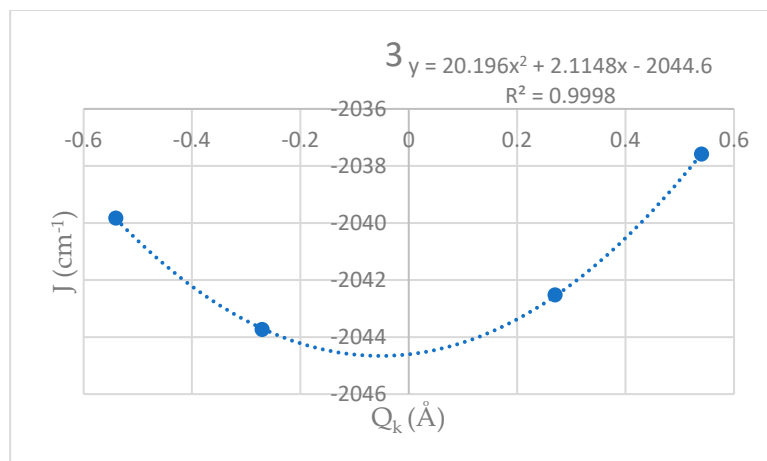

**Figure S11:** Calculated  $J$  values as a function of the distorted geometries  $Q_k$  with the fitting 2<sup>nd</sup> grade polynomial for phonon mode 3 at the  $\text{CrCl}_2(\text{pyz})_2$  system.

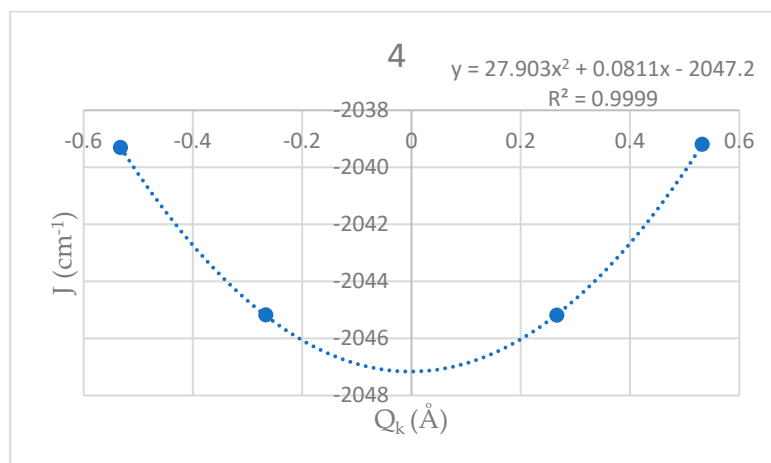

**Figure S12:** Calculated  $J$  values as a function of the distorted geometries  $Q_k$  with the fitting 2<sup>nd</sup> grade polynomial for phonon mode 4 at the  $\text{CrCl}_2(\text{pyz})_2$  system.

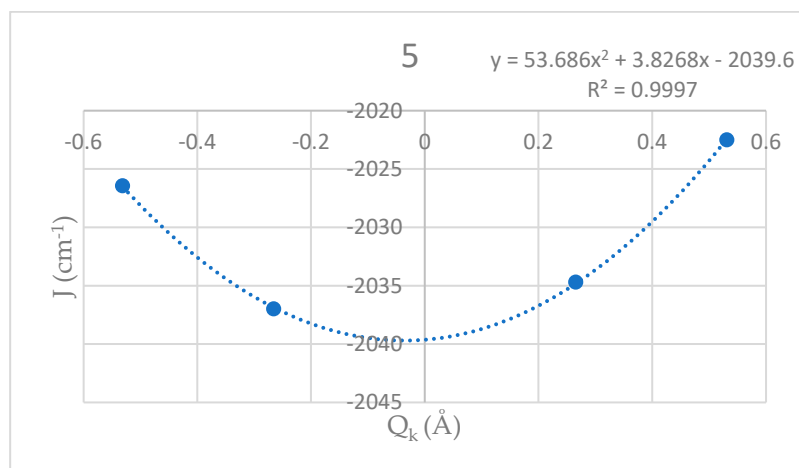

**Figure S13:** Calculated  $J$  values as a function of the distorted geometries  $Q_k$  with the fitting 2<sup>nd</sup> grade polynomial for phonon mode 5 at the  $\text{CrCl}_2(\text{pyz})_2$  system.

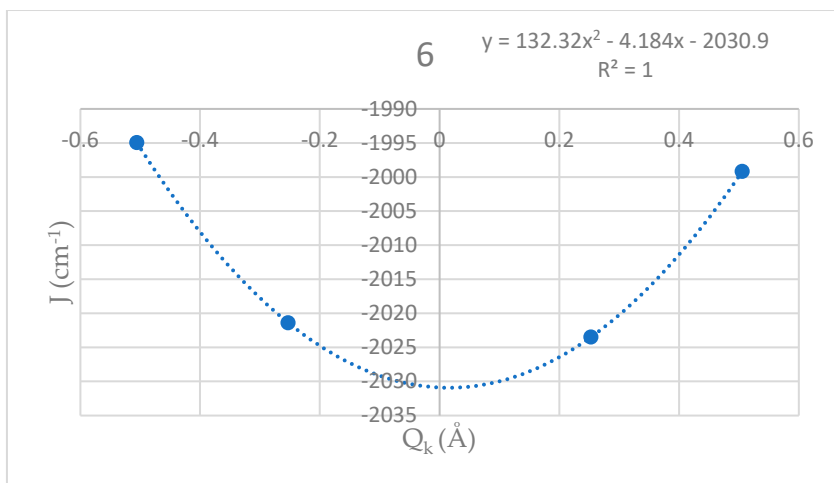

**Figure S14:** Calculated  $J$  values as a function of the distorted geometries  $Q_k$  with the fitting 2<sup>nd</sup> grade polynomial for phonon mode 6 at the  $\text{CrCl}_2(\text{pyz})_2$  system.

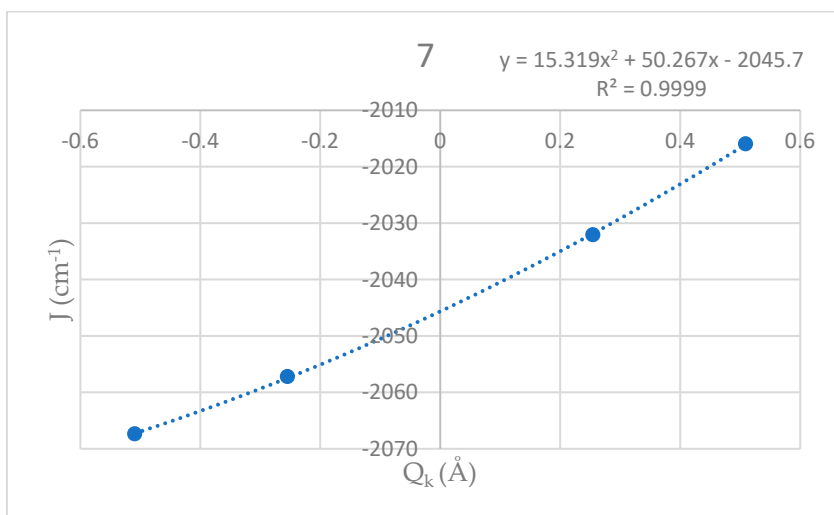

**Figure S15:** Calculated  $J$  values as a function of the distorted geometries  $Q_k$  with the fitting 2<sup>nd</sup> grade polynomial for phonon mode 7 at the  $\text{CrCl}_2(\text{pyz})_2$  system.

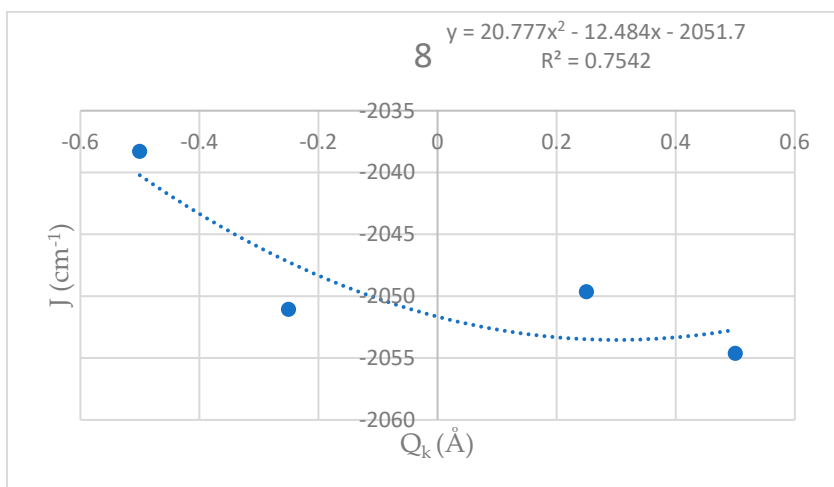

**Figure S16:** Calculated  $J$  values as a function of the distorted geometries  $Q_k$  with the fitting 2<sup>nd</sup> grade polynomial for phonon mode 8 at the  $\text{CrCl}_2(\text{pyz})_2$  system.

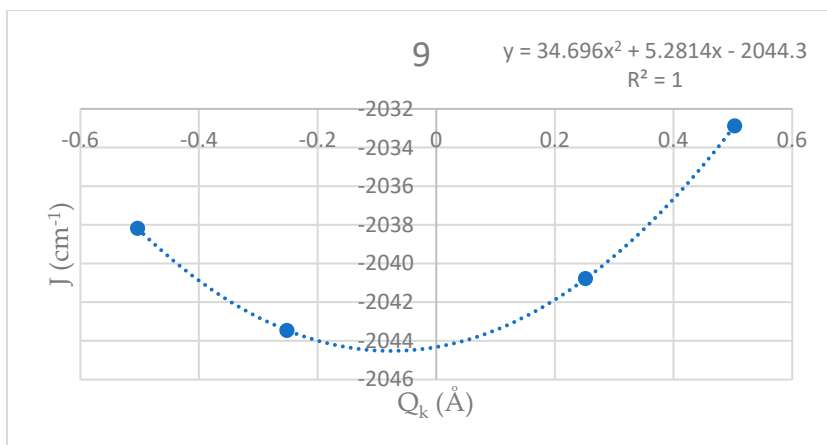

**Figure S17:** Calculated  $J$  values as a function of the distorted geometries  $Q_k$  with the fitting 2<sup>nd</sup> grade polynomial for phonon mode 9 at the  $\text{CrCl}_2(\text{pyz})_2$  system.

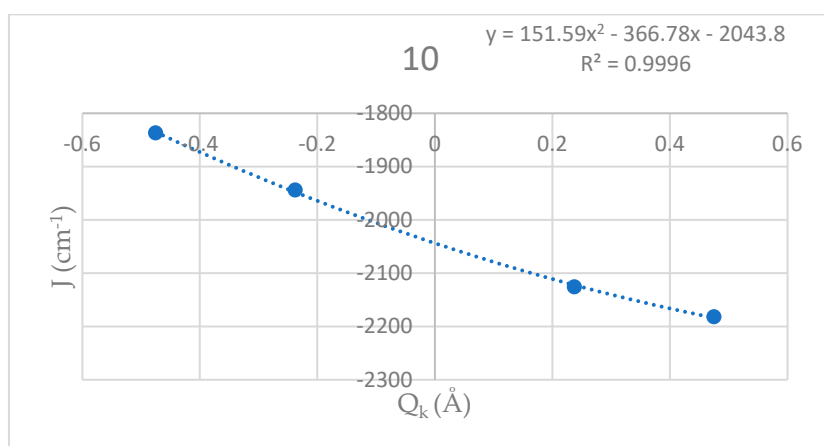

**Figure S18:** Calculated  $J$  values as a function of the distorted geometries  $Q_k$  with the fitting 2<sup>nd</sup> grade polynomial for phonon mode 10 at the  $\text{CrCl}_2(\text{pyz})_2$  system.

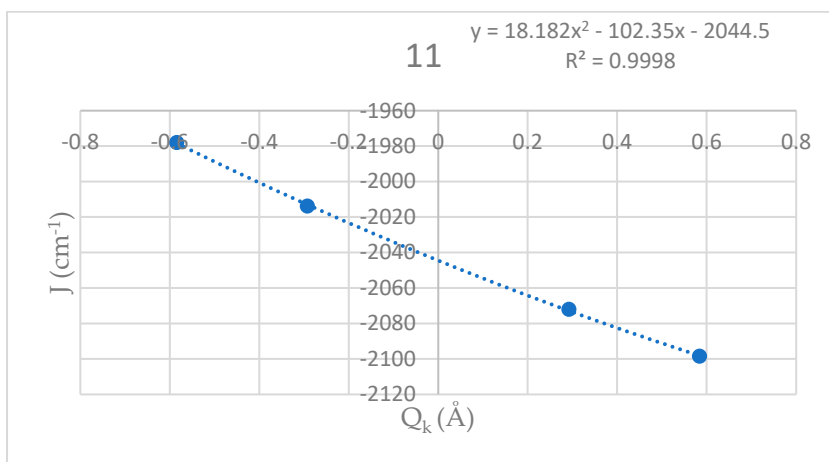

**Figure S19:** Calculated  $J$  values as a function of the distorted geometries  $Q_k$  with the fitting 2<sup>nd</sup> grade polynomial for phonon mode 11 at the  $\text{CrCl}_2(\text{pyz})_2$  system.

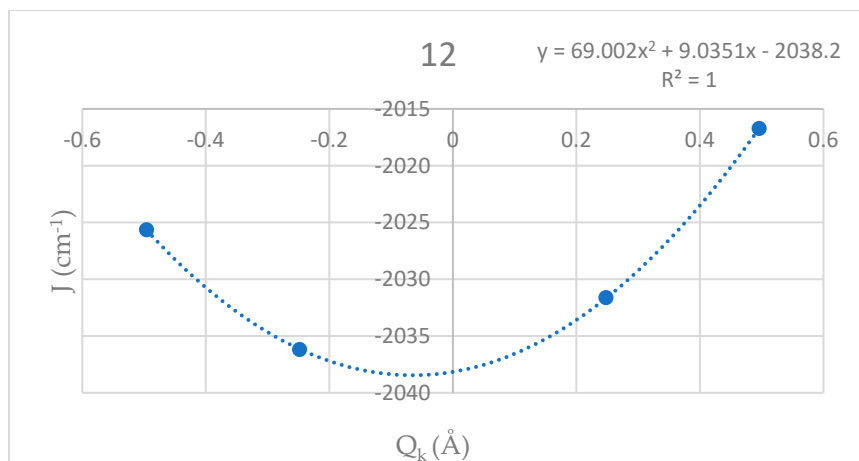

**Figure S20:** Calculated  $J$  values as a function of the distorted geometries  $Q_k$  with the fitting 2<sup>nd</sup> grade polynomial for phonon mode 12 at the  $\text{CrCl}_2(\text{pyz})_2$  system.

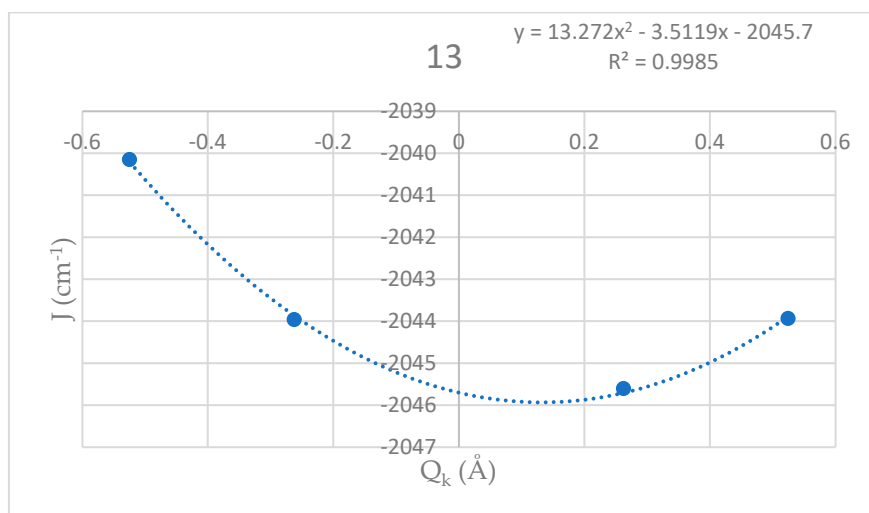

**Figure S21:** Calculated  $J$  values as a function of the distorted geometries  $Q_k$  with the fitting 2<sup>nd</sup> grade polynomial for phonon mode 13 at the  $\text{CrCl}_2(\text{pyz})_2$  system.

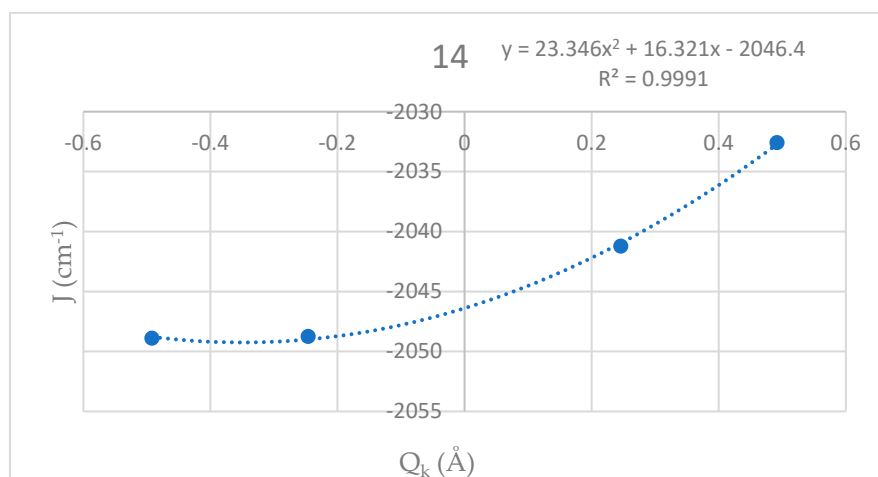

**Figure S22:** Calculated  $J$  values as a function of the distorted geometries  $Q_k$  with the fitting 2<sup>nd</sup> grade polynomial for phonon mode 14 at the  $\text{CrCl}_2(\text{pyz})_2$  system.

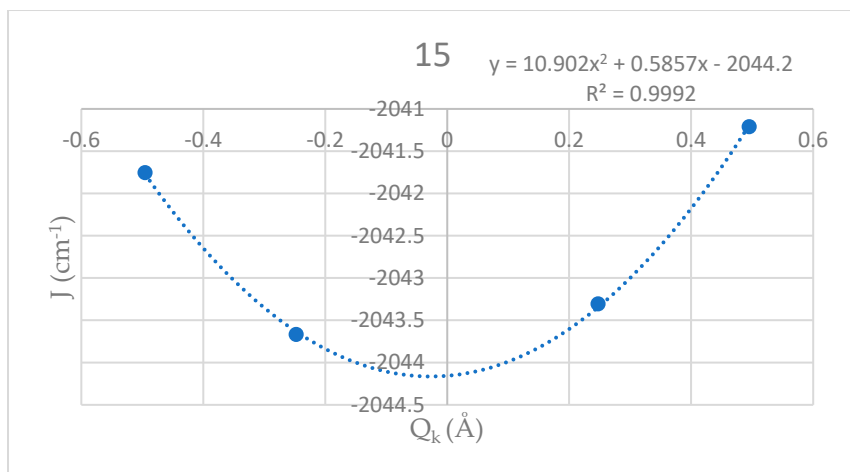

**Figure S23:** Calculated  $J$  values as a function of the distorted geometries  $Q_k$  with the fitting 2<sup>nd</sup> grade polynomial for phonon mode 15 at the  $\text{CrCl}_2(\text{pyz})_2$  system.

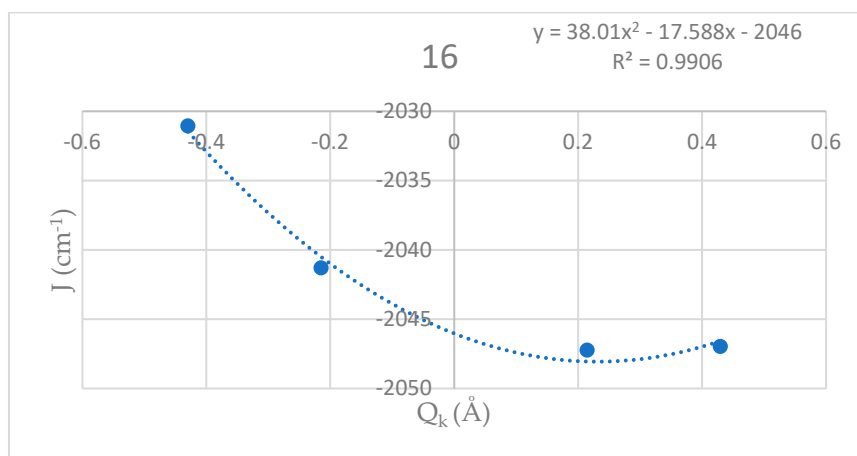

**Figure S24:** Calculated  $J$  values as a function of the distorted geometries  $Q_k$  with the fitting 2<sup>nd</sup> grade polynomial for phonon mode 16 at the  $\text{CrCl}_2(\text{pyz})_2$  system.

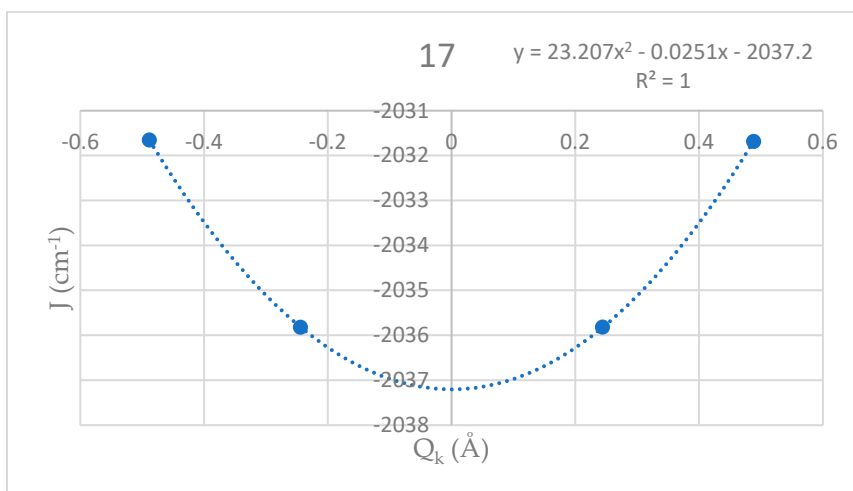

**Figure S25:** Calculated  $J$  values as a function of the distorted geometries  $Q_k$  with the fitting 2<sup>nd</sup> grade polynomial for phonon mode 17 at the  $\text{CrCl}_2(\text{pyz})_2$  system.

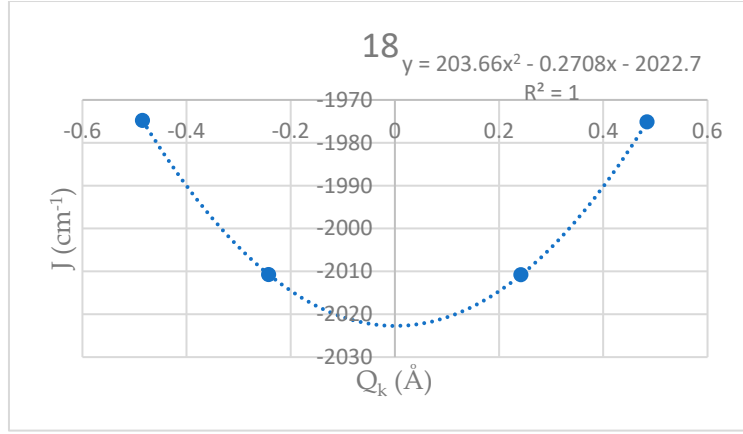

**Figure S26:** Calculated J values as a function of the distorted geometries  $Q_k$  with the fitting 2<sup>nd</sup> grade polynomial for phonon mode 18 at the CrCl<sub>2</sub>(pyz)<sub>2</sub> system.

**Table S4:**  $\left(\frac{\partial^2 J}{\partial Q_k^2}\right)_e$  calculated terms and  $Q_k$  for each phonon mode in CrCl<sub>2</sub>(pyz)<sub>2</sub> system.

| Phonon mode | $\left(\frac{\partial^2 J}{\partial Q_k^2}\right)_e$ (cm <sup>-1</sup> /Å <sup>2</sup> ) | $Q_k$ (Å) |
|-------------|------------------------------------------------------------------------------------------|-----------|
| 1           | 12.57                                                                                    | ±0.6870   |
| 2           | 41.21                                                                                    | ±0.6286   |
| 3           | 40.39                                                                                    | ±0.5403   |
| 4           | 55.81                                                                                    | ±0.5322   |
| 5           | 107.37                                                                                   | ±0.5312   |
| 6           | 264.64                                                                                   | ±0.5056   |
| 7           | 30.64                                                                                    | ±0.5091   |
| 8           | 41.55                                                                                    | ±0.5002   |
| 9           | 69.39                                                                                    | ±0.5033   |
| 10          | 303.18                                                                                   | ±0.4751   |
| 11          | 36.36                                                                                    | ±0.5843   |
| 12          | 138.00                                                                                   | ±0.4959   |
| 13          | 26.54                                                                                    | ±0.5246   |
| 14          | 46.69                                                                                    | ±0.4918   |
| 15          | 21.80                                                                                    | ±0.4952   |
| 16          | 76.02                                                                                    | ±0.4293   |
| 17          | 46.41                                                                                    | ±0.4882   |
| 18          | 407.32                                                                                   | ±0.4842   |

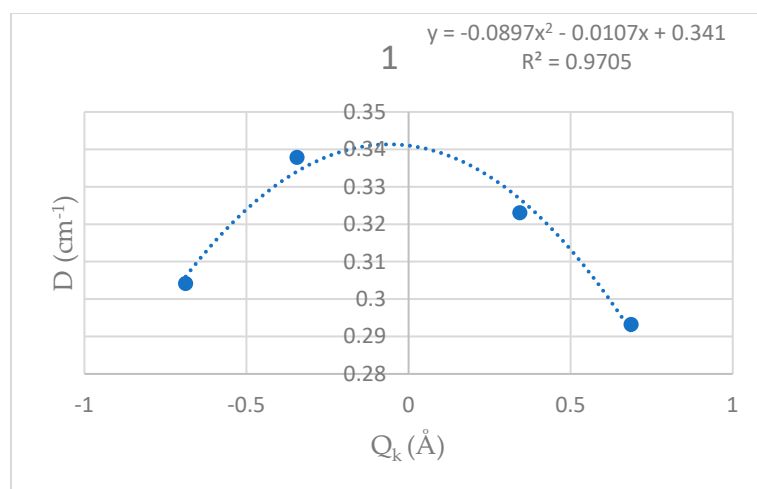

**Figure S27:** Calculated D values as a function of the distorted geometries  $Q_k$  with the fitting 2<sup>nd</sup> grade polynomial for phonon mode 1 at the  $\text{CrCl}_2(\text{pyz})_2$  system.

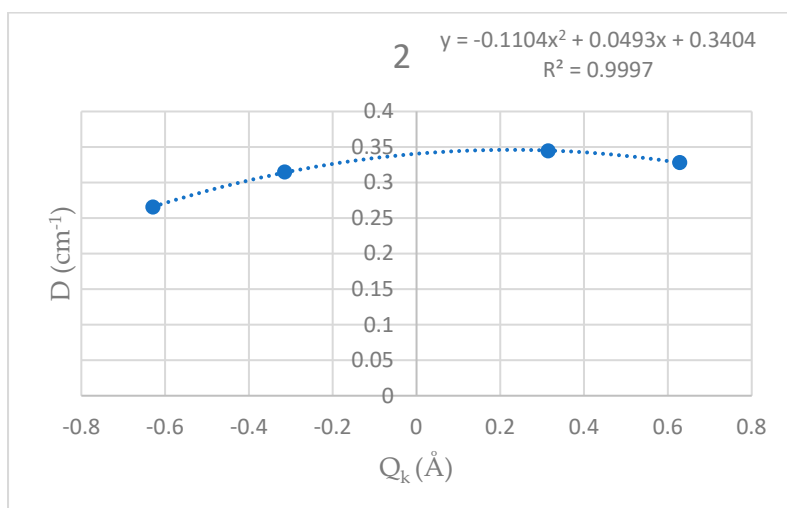

**Figure S28:** Calculated D values as a function of the distorted geometries  $Q_k$  with the fitting 2<sup>nd</sup> grade polynomial for phonon mode 2 at the  $\text{CrCl}_2(\text{pyz})_2$  system.

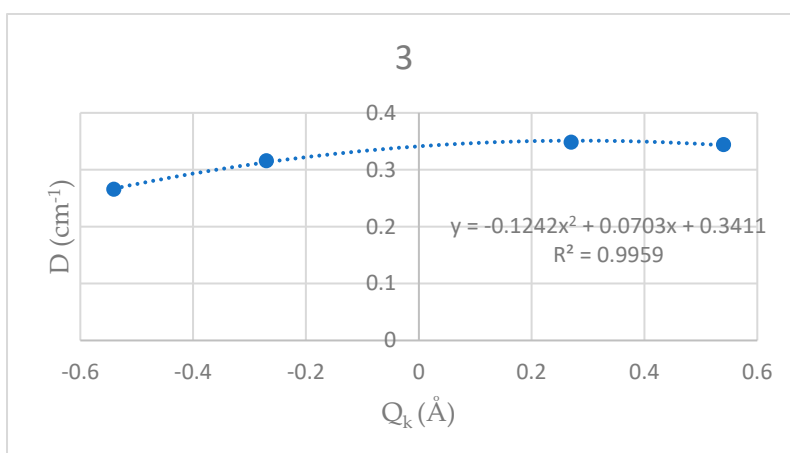

**Figure S29:** Calculated D values as a function of the distorted geometries  $Q_k$  with the fitting 2<sup>nd</sup> grade polynomial for phonon mode 3 at the  $\text{CrCl}_2(\text{pyz})_2$  system.

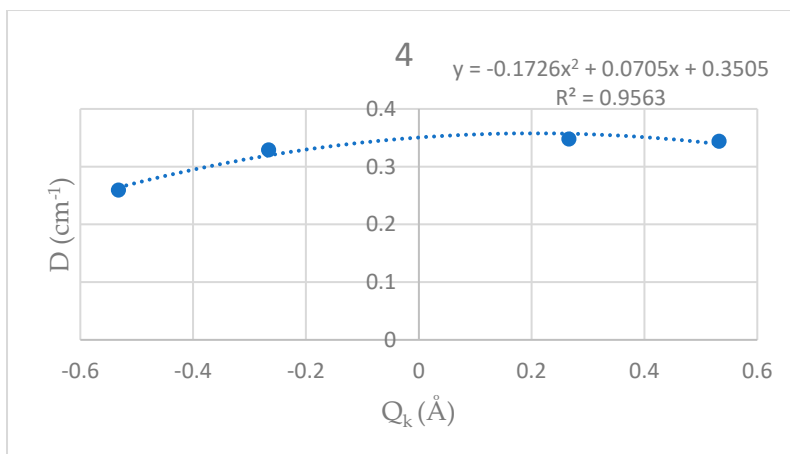

**Figure S30:** Calculated D values as a function of the distorted geometries  $Q_k$  with the fitting 2<sup>nd</sup> grade polynomial for phonon mode 4 at the  $\text{CrCl}_2(\text{pyz})_2$  system.

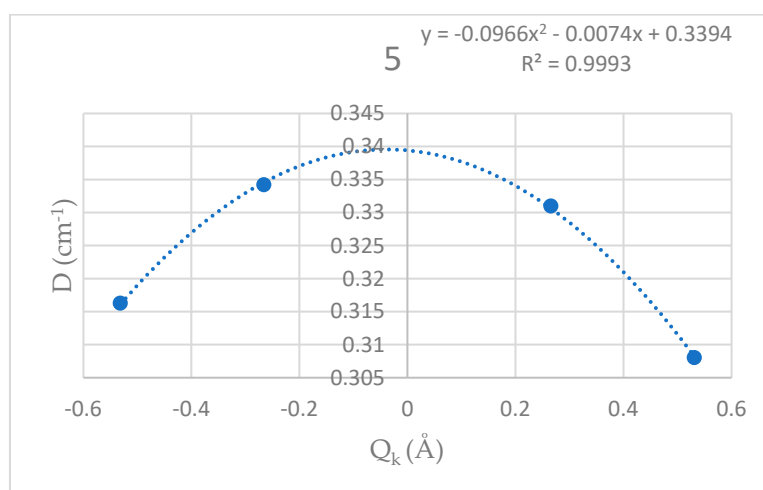

**Figure S31:** Calculated D values as a function of the distorted geometries  $Q_k$  with the fitting 2<sup>nd</sup> grade polynomial for phonon mode 5 at the  $\text{CrCl}_2(\text{pyz})_2$  system.

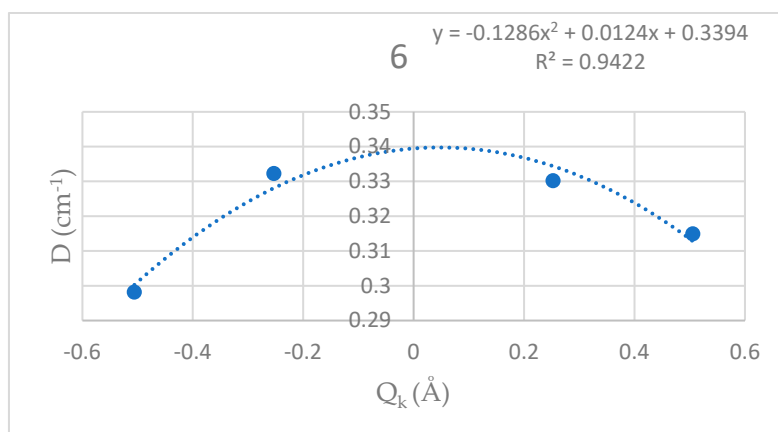

**Figure S32:** Calculated D values as a function of the distorted geometries  $Q_k$  with the fitting 2<sup>nd</sup> grade polynomial for phonon mode 6 at the  $\text{CrCl}_2(\text{pyz})_2$  system.

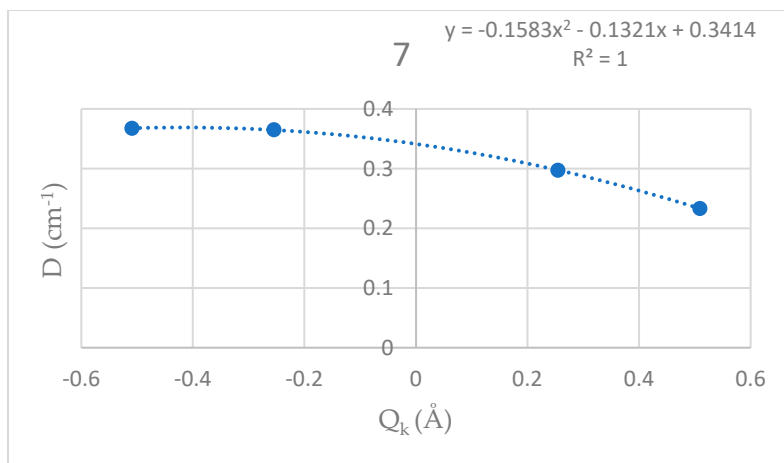

**Figure S33:** Calculated D values as a function of the distorted geometries  $Q_k$  with the fitting 2<sup>nd</sup> grade polynomial for phonon mode 7 at the  $\text{CrCl}_2(\text{pyz})_2$  system.

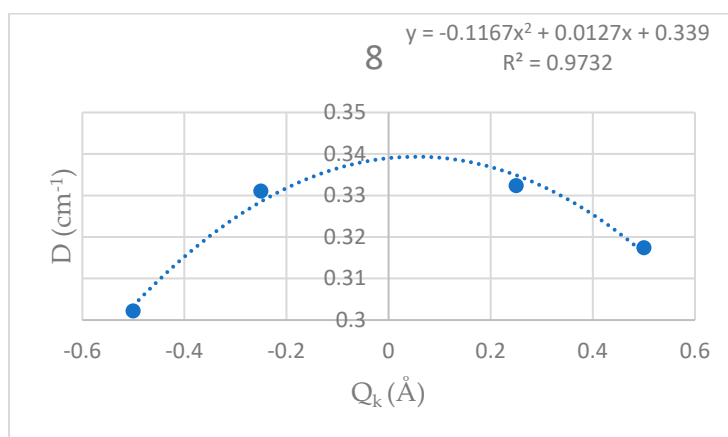

**Figure S34:** Calculated D values as a function of the distorted geometries  $Q_k$  with the fitting 2<sup>nd</sup> grade polynomial for phonon mode 8 at the  $\text{CrCl}_2(\text{pyz})_2$  system.

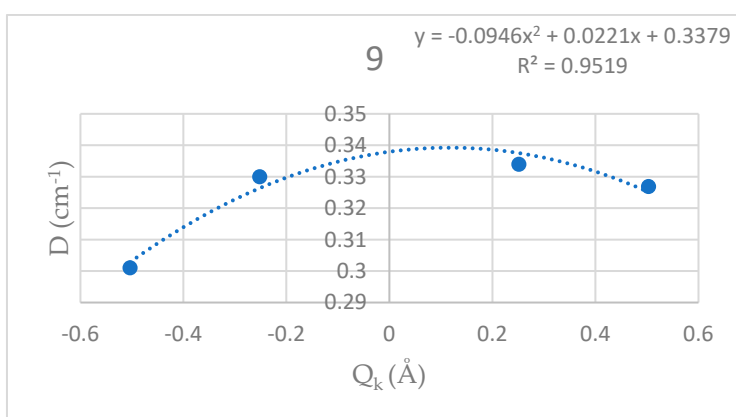

**Figure S35:** Calculated D values as a function of the distorted geometries  $Q_k$  with the fitting 2<sup>nd</sup> grade polynomial for phonon mode 9 at the  $\text{CrCl}_2(\text{pyz})_2$  system.

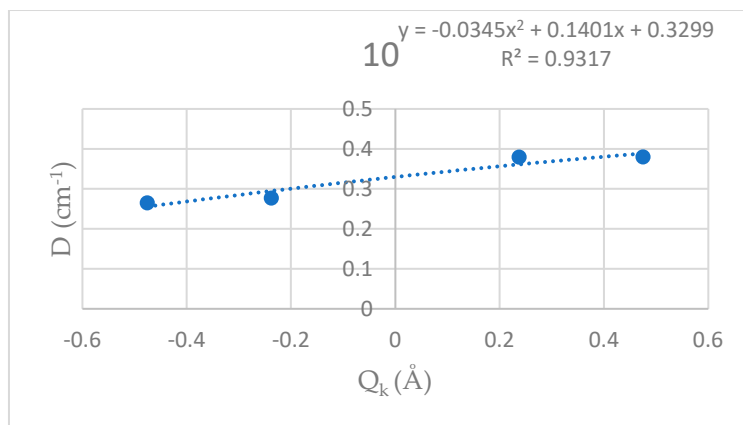

**Figure S36:** Calculated D values as a function of the distorted geometries  $Q_k$  with the fitting 2<sup>nd</sup> grade polynomial for phonon mode 10 at the  $\text{CrCl}_2(\text{pyz})_2$  system.

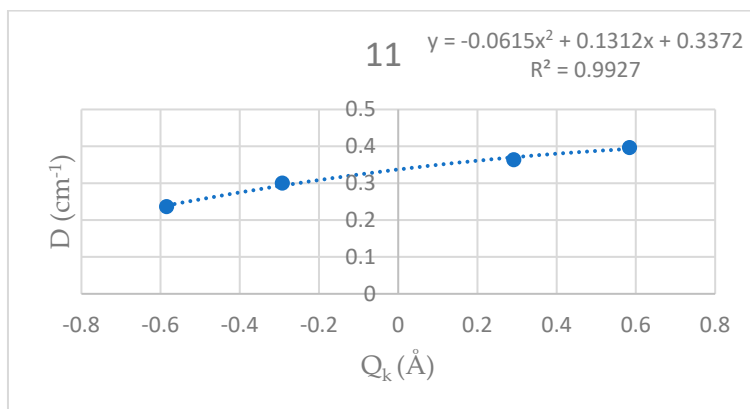

**Figure S37:** Calculated D values as a function of the distorted geometries  $Q_k$  with the fitting 2<sup>nd</sup> grade polynomial for phonon mode 11 at the  $\text{CrCl}_2(\text{pyz})_2$  system.

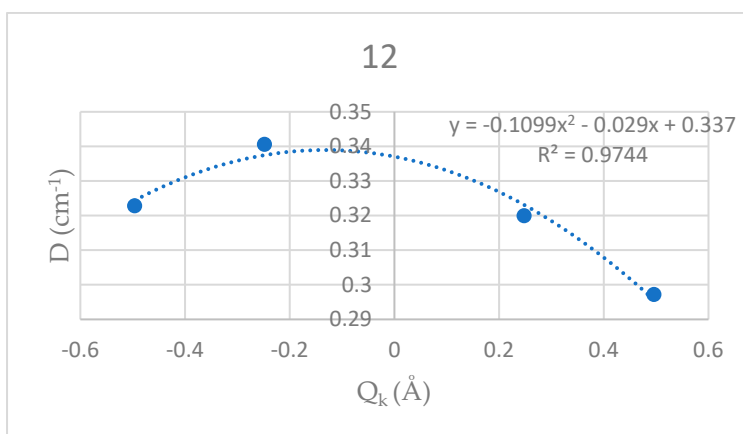

**Figure S38:** Calculated D values as a function of the distorted geometries  $Q_k$  with the fitting 2<sup>nd</sup> grade polynomial for phonon mode 12 at the  $\text{CrCl}_2(\text{pyz})_2$  system.

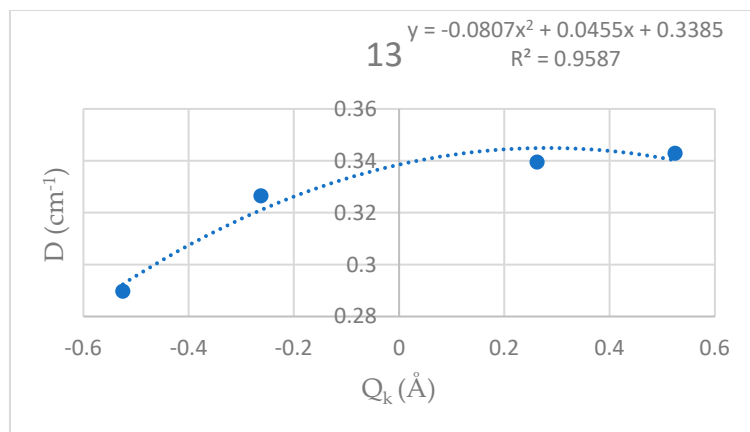

**Figure S39:** Calculated D values as a function of the distorted geometries  $Q_k$  with the fitting 2<sup>nd</sup> grade polynomial for phonon mode 13 at the  $\text{CrCl}_2(\text{pyz})_2$  system.

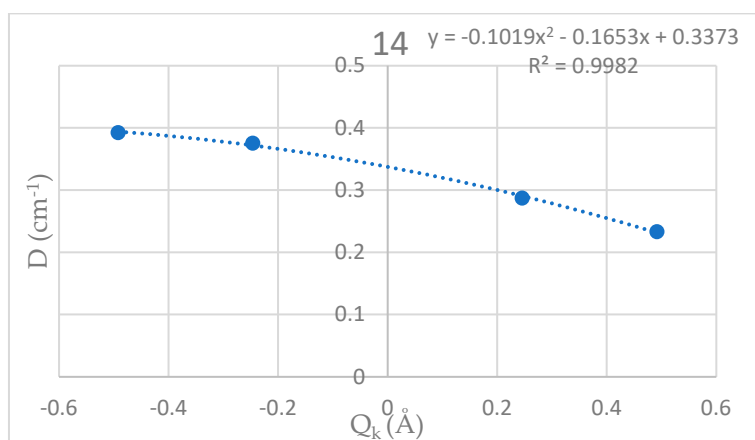

**Figure S40:** Calculated D values as a function of the distorted geometries  $Q_k$  with the fitting 2<sup>nd</sup> grade polynomial for phonon mode 14 at the  $\text{CrCl}_2(\text{pyz})_2$  system.

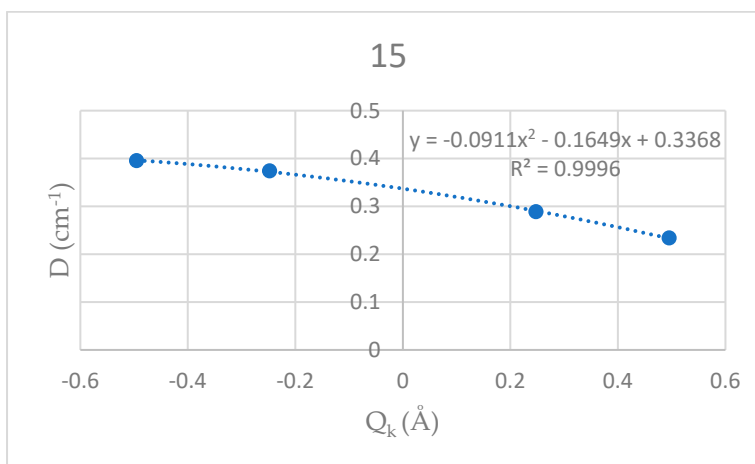

**Figure S41:** Calculated D values as a function of the distorted geometries  $Q_k$  with the fitting 2<sup>nd</sup> grade polynomial for phonon mode 15 at the  $\text{CrCl}_2(\text{pyz})_2$  system.

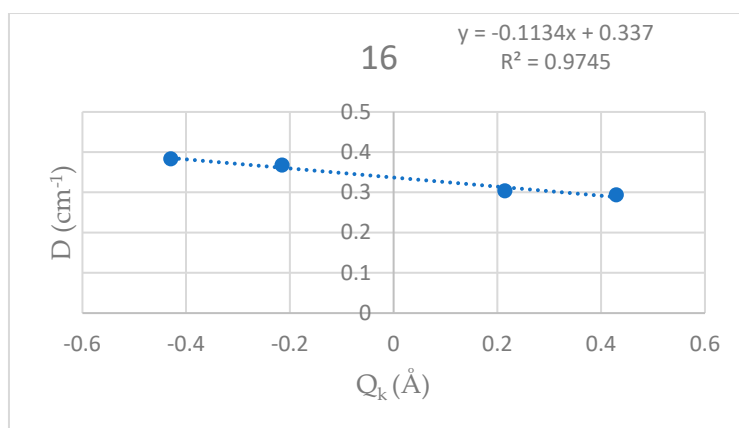

**Figure S42:** Calculated D values as a function of the distorted geometries  $Q_k$  with the fitting 2<sup>nd</sup> grade polynomial for phonon mode 16 at the  $\text{CrCl}_2(\text{pyz})_2$  system.

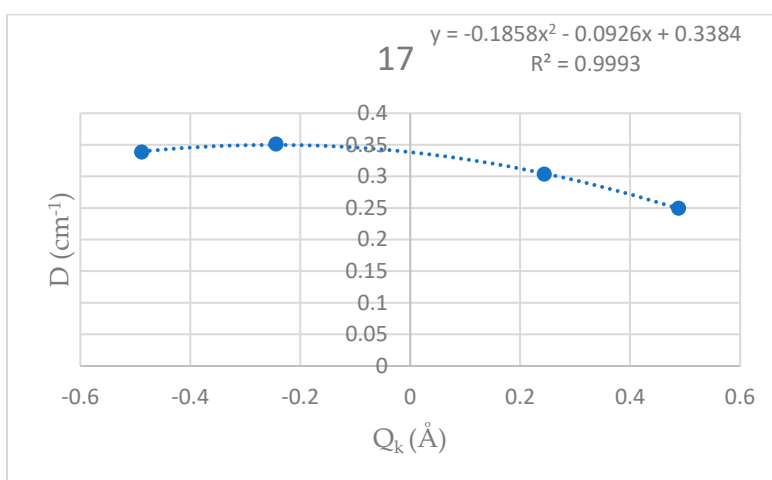

**Figure S43:** Calculated D values as a function of the distorted geometries  $Q_k$  with the fitting 2<sup>nd</sup> grade polynomial for phonon mode 17 at the  $\text{CrCl}_2(\text{pyz})_2$  system.

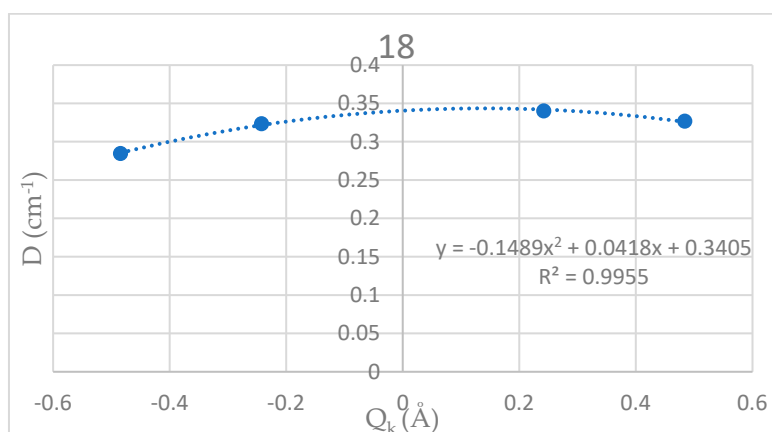

**Figure S44:** Calculated D values as a function of the distorted geometries  $Q_k$  with the fitting 2<sup>nd</sup> grade polynomial for phonon mode 18 at the  $\text{CrCl}_2(\text{pyz})_2$  system.

**Table S5:**  $\left(\frac{\partial^2 D}{\partial Q_k^2}\right)_e$  calculated terms and  $Q_k$  for each phonon mode in  $\text{CrCl}_2(\text{pyz})_2$  system.

| Phonon mode | $\left(\frac{\partial^2 D}{\partial Q_k^2}\right)_e$ ( $\text{cm}^{-1}/\text{\AA}^2$ ) | $Q_k$ ( $\text{\AA}$ ) |
|-------------|----------------------------------------------------------------------------------------|------------------------|
| 1           | -0.1794                                                                                | $\pm 0.6870$           |
| 2           | -0.2208                                                                                | $\pm 0.6286$           |
| 3           | -0.2484                                                                                | $\pm 0.5403$           |
| 4           | -0.3452                                                                                | $\pm 0.5322$           |
| 5           | -0.1932                                                                                | $\pm 0.5312$           |
| 6           | -0.2572                                                                                | $\pm 0.5056$           |
| 7           | -0.0308                                                                                | $\pm 0.5091$           |
| 8           | -0.2334                                                                                | $\pm 0.5002$           |
| 9           | -0.1892                                                                                | $\pm 0.5033$           |
| 10          | -0.069                                                                                 | $\pm 0.4751$           |
| 11          | -0.123                                                                                 | $\pm 0.5843$           |
| 12          | -0.2198                                                                                | $\pm 0.4959$           |
| 13          | -0.1614                                                                                | $\pm 0.5246$           |
| 14          | -0.2038                                                                                | $\pm 0.4918$           |
| 15          | -0.1822                                                                                | $\pm 0.4952$           |
| 16          | -0.2268                                                                                | $\pm 0.4293$           |
| 17          | -0.3716                                                                                | $\pm 0.4882$           |
| 18          | -0.2978                                                                                | $\pm 0.4842$           |

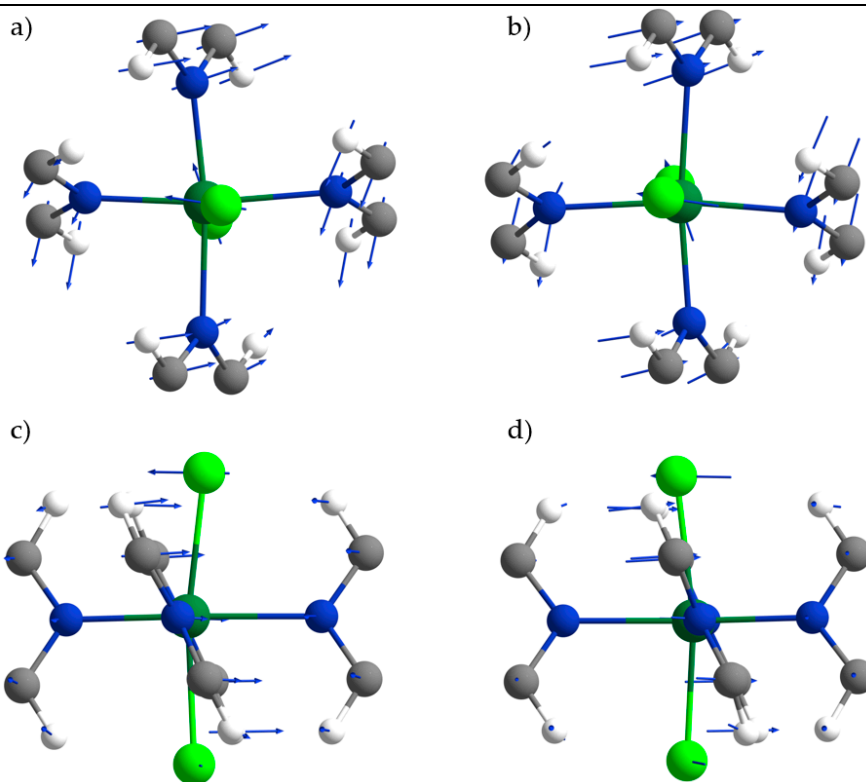

**Figure S45:** Graphical representation of phonon mode 6 on  $\text{CrCl}_2(\text{pyz})_2$  (a) top view of negative phase (b) top view of positive phase (c) side view of negative phase (d) side view of positive phase.

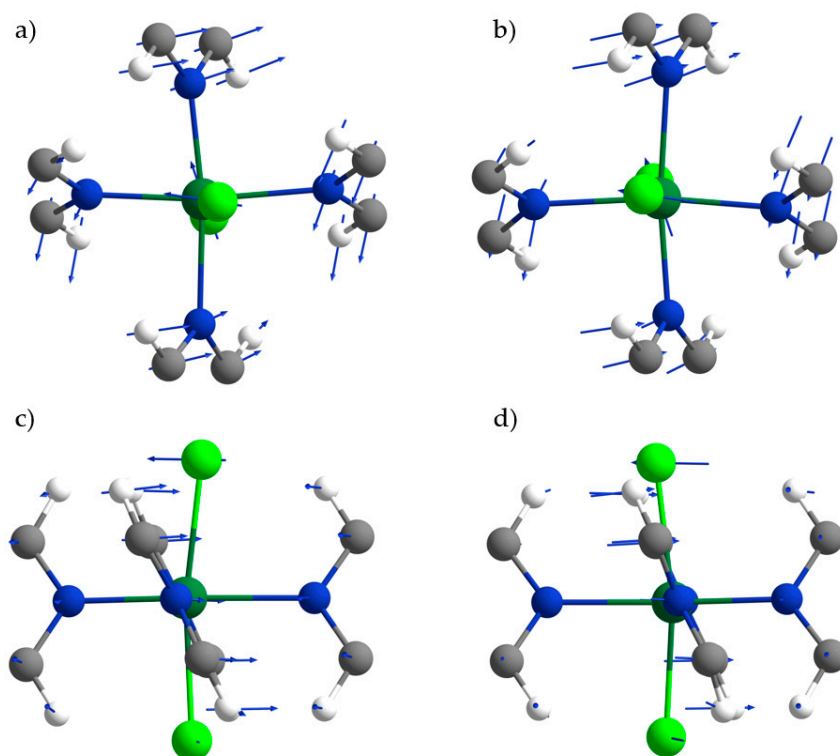

**Figure S46:** Graphical representation of phonon mode 10 on  $\text{CrCl}_2(\text{pyz})_2$  (a) top view of negative phase (b) top view of positive phase (c) side view of negative phase (d) side view of positive phase.

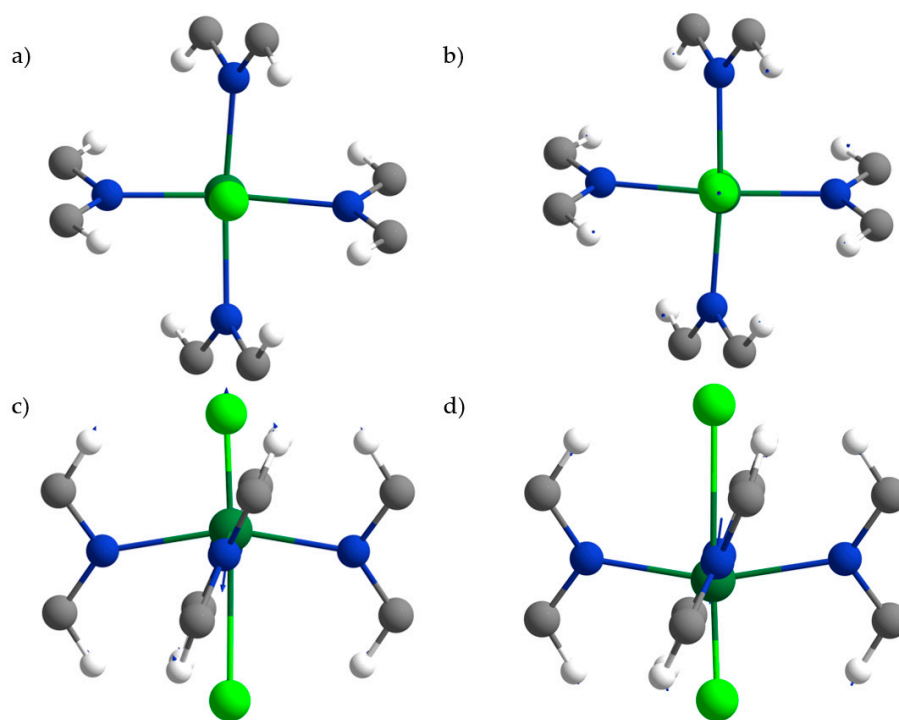

**Figure S47:** Graphical representation of phonon mode 18 on  $\text{CrCl}_2(\text{pyz})_2$  (a) top view of negative phase (b) top view of positive phase (c) side view of negative phase (d) side view of positive phase.
